# Supplementary material for: Development of a Comprehensive Food Literacy Measurement Tool Integrating the Food System and Sustainability
Source: MDPI journal article supplement (doi:10.3390/nu12113300), 2020-10-28
Supplement: s1 [file s1]

**Supplementary Table 1.** Lists of literature including questions related to food literacy

|    | Authors                    | Year | Number of questions | Reference                                                                                                                                                                                  |
|----|----------------------------|------|---------------------|--------------------------------------------------------------------------------------------------------------------------------------------------------------------------------------------|
| 1  | Vidgen, H. & Gallegos, D   | 2013 | 75                  | What is Food Literacy and Does It Influence What We Eat?                                                                                                                                   |
| 2  | Poelman, M.P. et al.       | 2018 | 29                  | Towards the Measurement of Food Literacy with Respect to Healthy Eating: The Development and Validation of the Self Perceived Food Literacy Scale Among an Adult Sample in the Netherlands |
| 3  | Gréa, K.C et al.           | 2018 | 12                  | A Short Food Literacy Questionnaire (SFLQ) for Adults: Findings from A Swiss Validation Study                                                                                              |
| 4  | Begley, A et al.           | 2019 | 6                   | Identifying Participants Who Would Benefit the Most from an Adult Food-Literacy Program                                                                                                    |
| 5  | Amin, S.A. et al.          | 2018 | 6                   | Identifying Food Literacy Educational Opportunities for Youth                                                                                                                              |
| 6  | Garcia-Gonzalez, A. et al. | 2018 | 9                   | Identifying Factors Related to Food Agency: Cooking Habits in the Spanish Adult Population-A Cross-Sectional Study                                                                         |
| 7  | De Souza, R.S. et al.      | 2015 | 4                   | General Nutrition Knowledge Questionnaire - Modified and Validated for Use in German Adolescent Athletes                                                                                   |
| 8  | Fordyce, V.S.              | 2018 | 22                  | A Food Literacy Model for Food Education Program Design and Evaluation                                                                                                                     |
| 9  | Begley, A. et al.          | 2019 | 20                  | Examining the Association Between Food Literacy and Food Insecurity                                                                                                                        |
| 10 | Begley, A. et al.          | 2019 | 4                   | Effectiveness of an Adult Food Literacy Program                                                                                                                                            |
| 11 | Vidgen, H et al.           | 2014 | 11                  | Defining Food Literacy and Its Components                                                                                                                                                  |
| 12 | Ronto, R. et al.           | 2016 | 22                  | Adolescents' Perspectives on Food Literacy and Its Impact on Their Dietary Behaviours                                                                                                      |
| 13 | Kim, H.S. & Kim, J.W.      | 2018 | 32                  | The Effects of Dietary Life Education Program for Prospective Elementary Teacher                                                                                                           |
| 14 | Naigaga, D.A. et al.       | 2018 | 5                   | Assessing Adolescents' Perceived Proficiency in Critically Evaluating Nutrition Information                                                                                                |

|    |                               |      |    |                                                                                                                                                                        |
|----|-------------------------------|------|----|------------------------------------------------------------------------------------------------------------------------------------------------------------------------|
| 15 | Gibbs, H.D. et al.            | 2016 | 5  | Assessing the Nutrition Literacy of Parents and Its Relationship with Child Diet Quality                                                                               |
| 16 | Aihara, Y. & Minai, J.        | 2011 | 9  | Barriers and Catalysts of Nutrition Literacy among Elderly Japanese People                                                                                             |
| 17 | Law, Q.P.S. et al.            | 2019 | 11 | Chinese Adults' Nutrition Label Literacy in Hong Kong: Implications for Nurses                                                                                         |
| 18 | Mahmudiono, T. et al.         | 2018 | 21 | Comparison of Maternal Nutrition Literacy, Dietary Diversity, and Food Security Among Households with and Without Double Burden of Malnutrition in Surabaya, Indonesia |
| 19 | Liao, L.L. & Lai, I.J.        | 2017 | 32 | Construction of Nutrition Literacy Indicators for College Students in Taiwan: A Delphi Consensus Study                                                                 |
| 20 | Doustmohammadian A. et al.    | 2017 | 51 | Developing and Validating A Scale to Measure Food and Nutrition Literacy (FNLit) in Elementary School Children in Iran                                                 |
| 21 | Michou M. et al.              | 2019 | 25 | Development & Validation of the Greek Version of the Nutrition Literacy Scale                                                                                          |
| 22 | Coffman, M.J. & La-Rocque, S. | 2012 | 26 | Development and Testing of the Spanish Nutrition Literacy Scale                                                                                                        |
| 23 | Lio, L.L. et al.              | 2018 | 29 | Development and Validation of the Nutrition Literacy Measure for Taiwanese College Students                                                                            |
| 24 | Ringland, E.M. et al.         | 2016 | 16 | Evaluation of an Electronic Tool to Assess Food Label Literacy in Adult Australians: A Pilot Study                                                                     |
| 25 | Ballance, D. & Webb, N.       | 2015 | 26 | For the Mouths of Babes: Nutrition Literacy Outreach to A Child Care Center                                                                                            |
| 26 | Gibbs, H.D. et al.            | 2016 | 6  | Measuring Nutrition Literacy in Breast Cancer Patients: Development of A Novel Instrument                                                                              |
| 27 | Gibbs, H.D. et al.            | 2018 | 4  | The Nutrition Literacy Assessment Instrument is A Valid and Reliable Measure of Nutrition Literacy in Adults with Chronic Disease                                      |
| 28 | Velardo, S. & Drummond, M.    | 2019 | 23 | Qualitative Insight into Primary School Children's Nutrition Literacy                                                                                                  |
| 29 | Gibbs, H.D. et al.            | 2020 | 6  | Validity of an Updated Nutrition Literacy Assessment Instrument with the New Nutrition Facts Panel                                                                     |

---
